# Supplementary material for: Double-Layer Agar (DLA) Modifications for the First Step of the Phage-Antibiotic Synergy (PAS) Identification
Source: MDPI journal article supplement (doi:10.3390/antibiotics10111306), 2021-10-26
Supplement: s1 [file s1]

# Double-Layer Agar (DLA) Modifications for the First Step of the Phage-Antibiotic Synergy (PAS) Identification

Xymena Stachurska, Marta Roszak, Joanna Jabłońska, Małgorzata Mizielińska and Paweł Nawrotek

## Supplementary Material

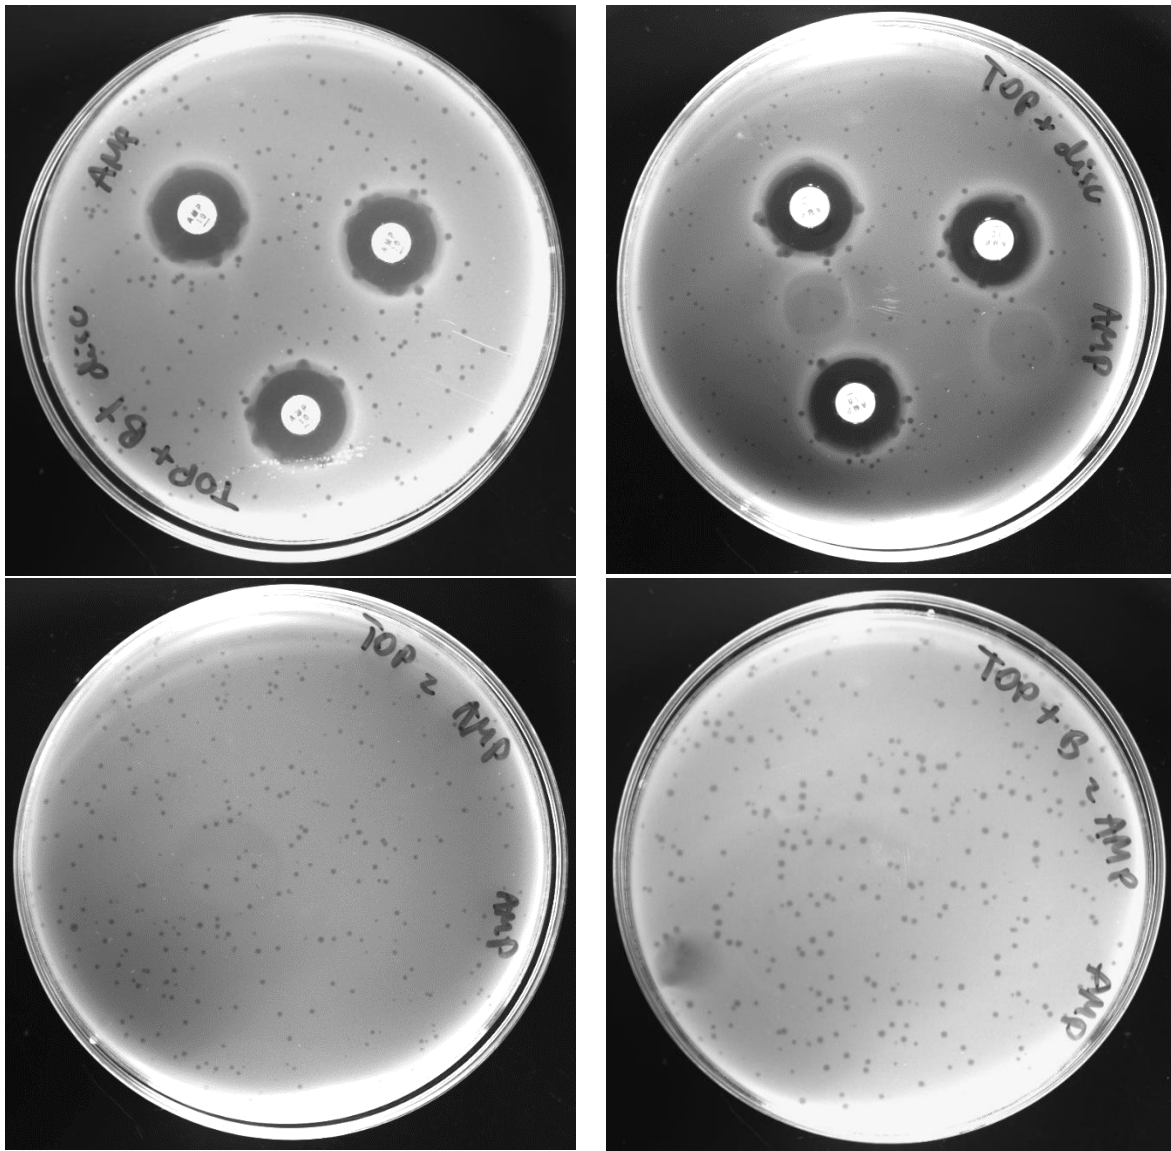

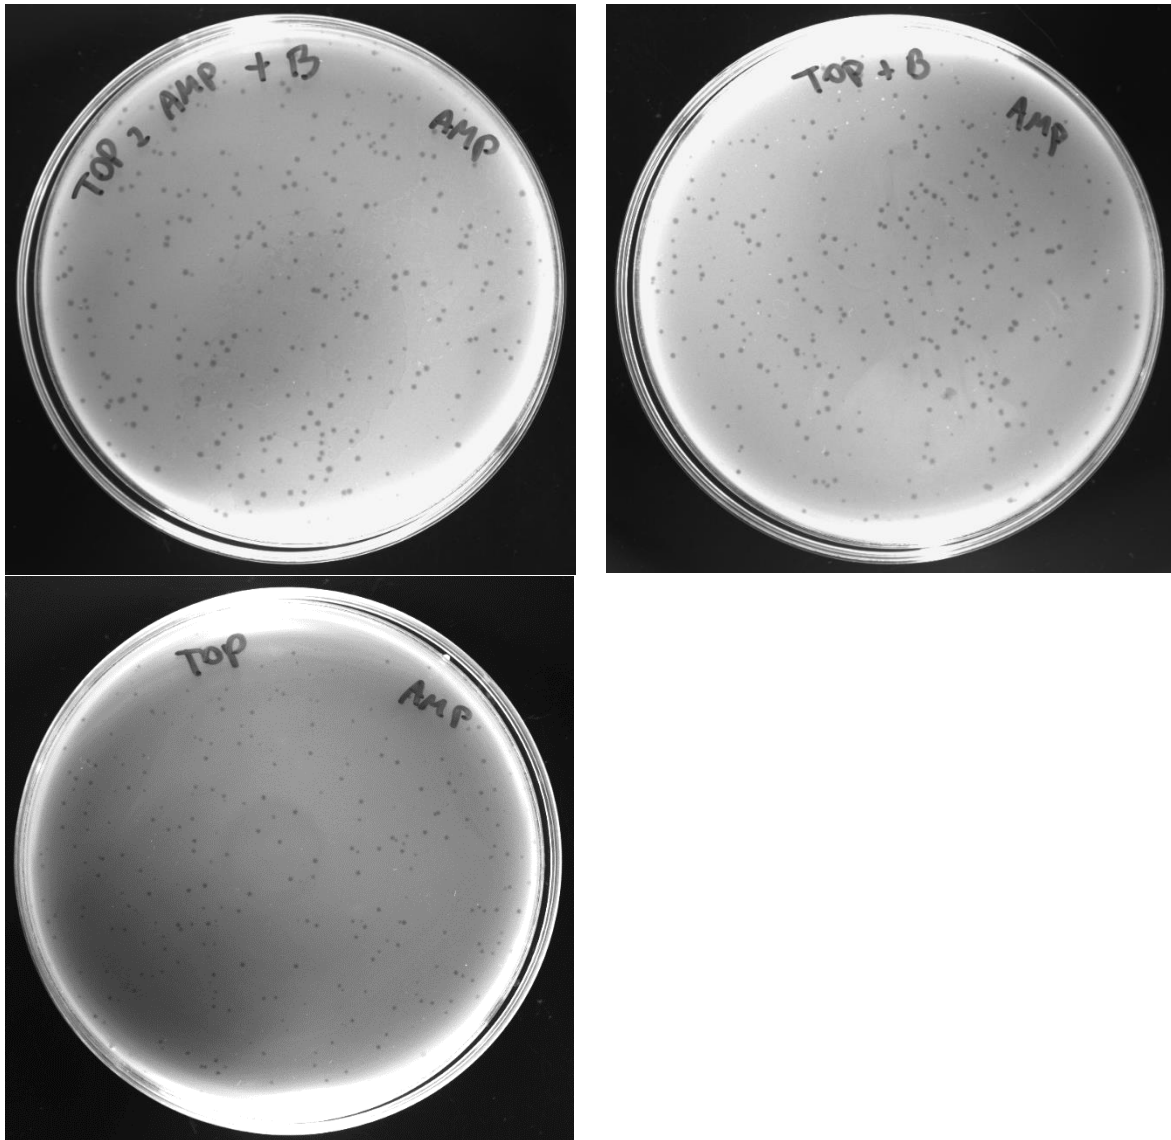

**Figure S1.** Photographs visualizing plaque sizes and arrangement with the use of ampicillin in different variables of the DLA method.

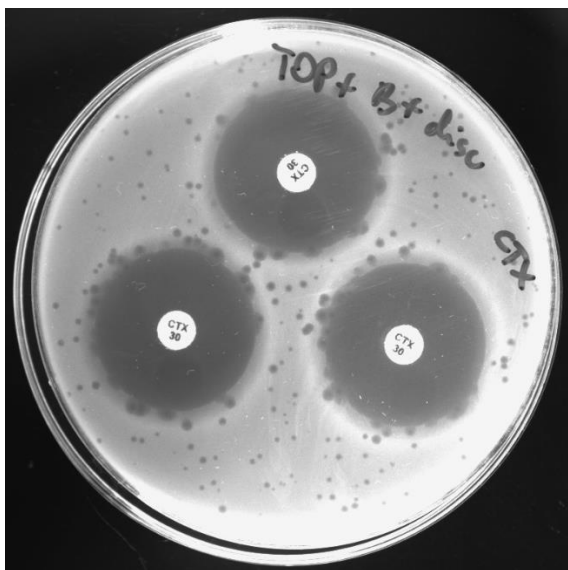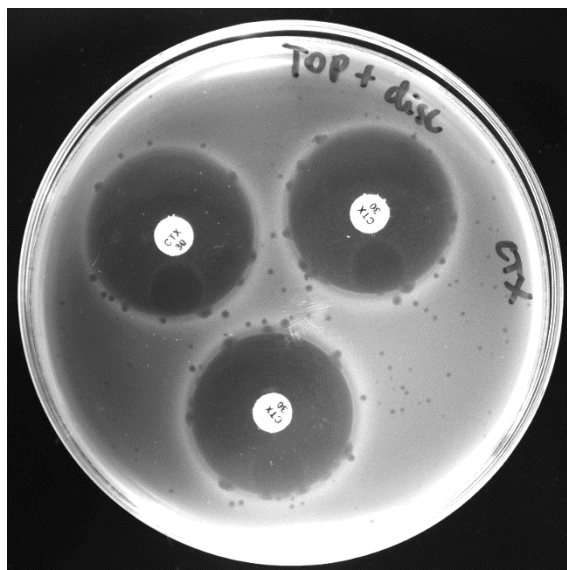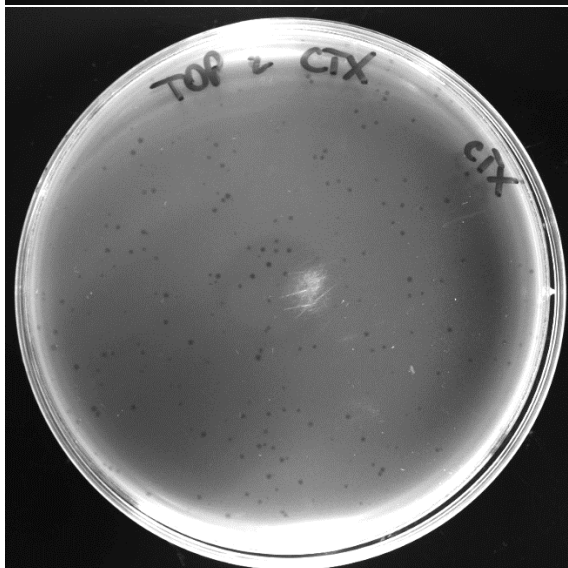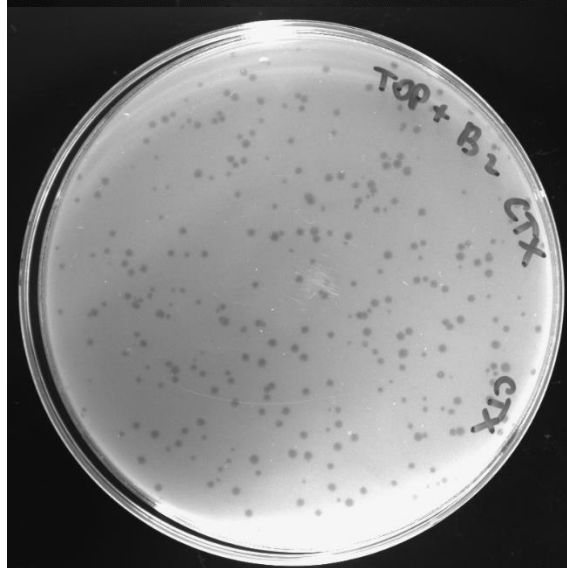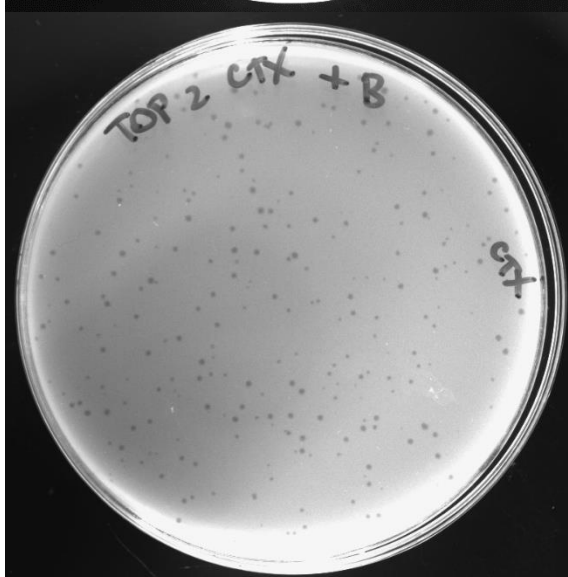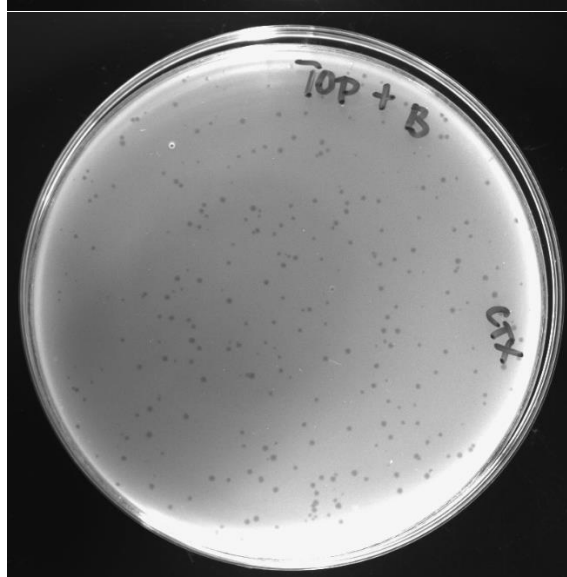

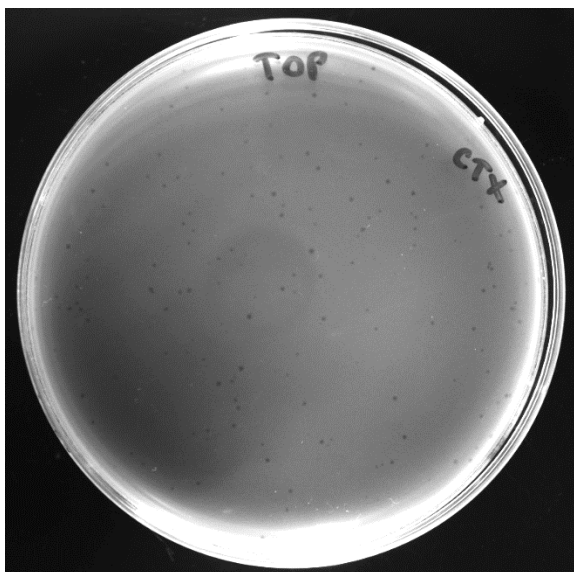

**Figure S2** Photographs visualizing plaque sizes and arrangement with the use of cefotaxime in different variables of the DLA method.
